# Supplementary material for: Investigating the association between African spontaneously fermented dairy products, faecal carriage of Streptococcus infantarius subsp. infantarius and colorectal adenocarcinoma in Kenya
Source: PubMed Central journal article supplement (PMC5766739; doi:10.1016/j.actatropica.2017.10.018), 2018-02

|                                        | CD1      |       | Alt.CD1    |        | Alt.CD2 |       |
|----------------------------------------|----------|-------|------------|--------|---------|-------|
| Case def.:                             | Norm/CRC |       | Norm/colon |        | N+C/CRC |       |
|                                        | contr.   | case  | contr.     | case   | contr.  | case  |
| Raw cow milk %                         | 3%       | 4%    | 3%         | 4%     | 3%      | 4%    |
| $N_{\text{pos}}/N_{\text{tot}}$        | 5/193    | 3/80  | 5/193      | 8/220  | 10/333  | 3/80  |
| Spontan. FDP %                         | 19%      | 24%   | 19%        | 25%    | 22%     | 24%   |
| (tFDP) $N_{\text{pos}}/N_{\text{tot}}$ | 36/193   | 19/80 | 36/193     | 56/220 | 73/333  | 19/80 |
| Mala %                                 | 40%      | 39%   | 40%        | 36%    | 38%     | 39%   |
| (cFDP) $N_{\text{pos}}/N_{\text{tot}}$ | 77/193   | 31/80 | 77/193     | 79/220 | 125/333 | 31/80 |
| Yoghurt %                              | 48%      | 36%   | 48%        | 45%    | 49%     | 36%   |
| (cFDP) $N_{\text{pos}}/N_{\text{tot}}$ | 93/193   | 29/80 | 93/193     | 98/220 | 162/333 | 29/80 |

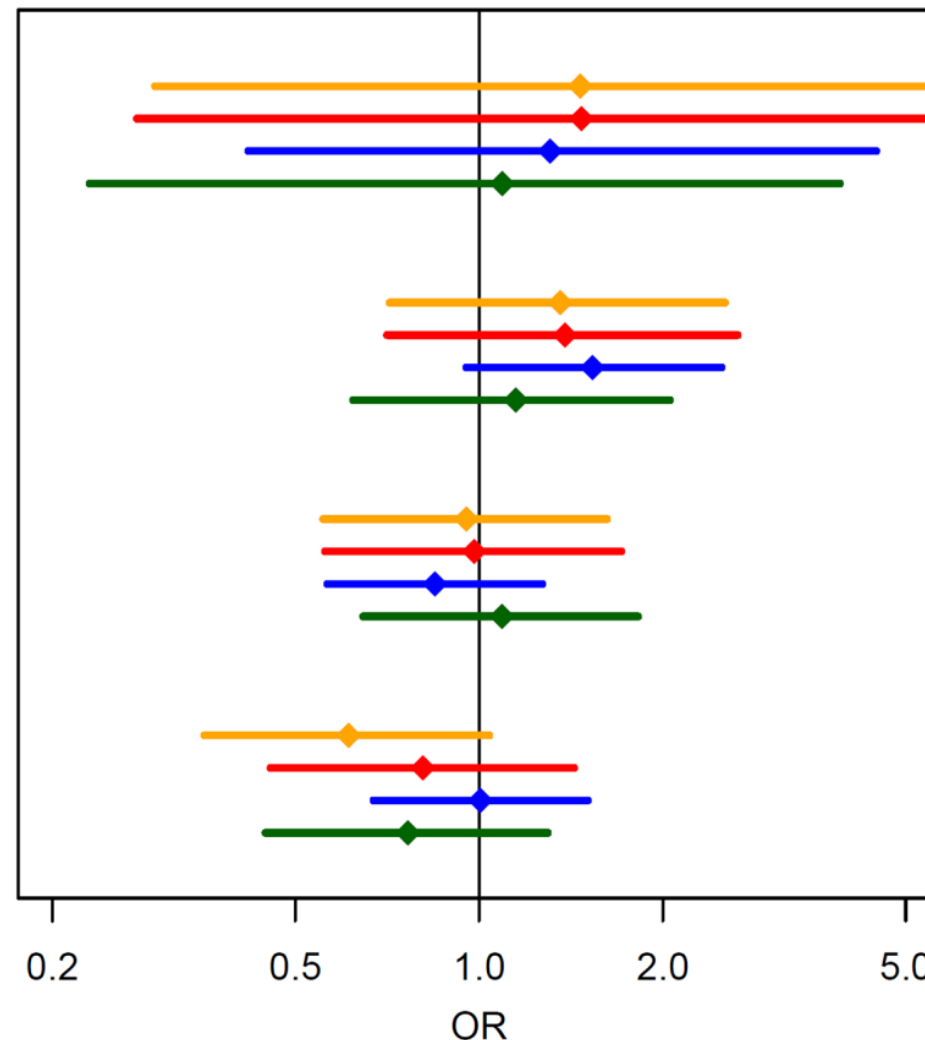

**Fig. A.1:**

Sensitivity analysis assessing the robustness of the results with respect to alternative case definitions. Presented are odds ratios and their corresponding confidence intervals estimated by logistic regression:

**orange** (primary definition, unadjusted) Cases: CRC, polyps – Controls: normal gastrointestinal tract (GIT); **red** (primary definition, adjusted for age, sex and residency); **blue** (alternative definition 1, adjusted) Cases: CRC, polyps, haemorrhoids, colitis – Controls: normal GIT; **green** (alternative definition 2, adjusted) Cases: CRC, polyps – Controls: normal GIT, haemorrhoids, colitis.

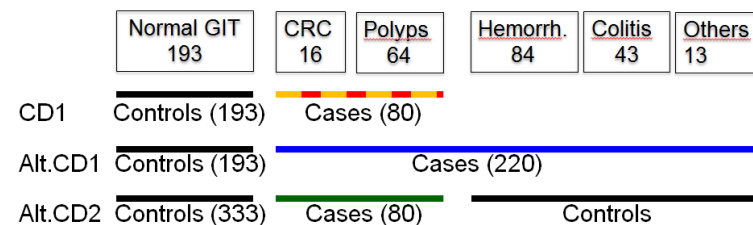

Supplement: mmc1.pdf [file mmc1.pdf]
